# Supplementary material for: Shared and genetically distinct Zea mays transcriptome responses to ongoing and past low temperature exposure
Source: PubMed Central journal article supplement (PMC6196024; doi:10.1186/s12864-018-5134-7), 2018-10-20

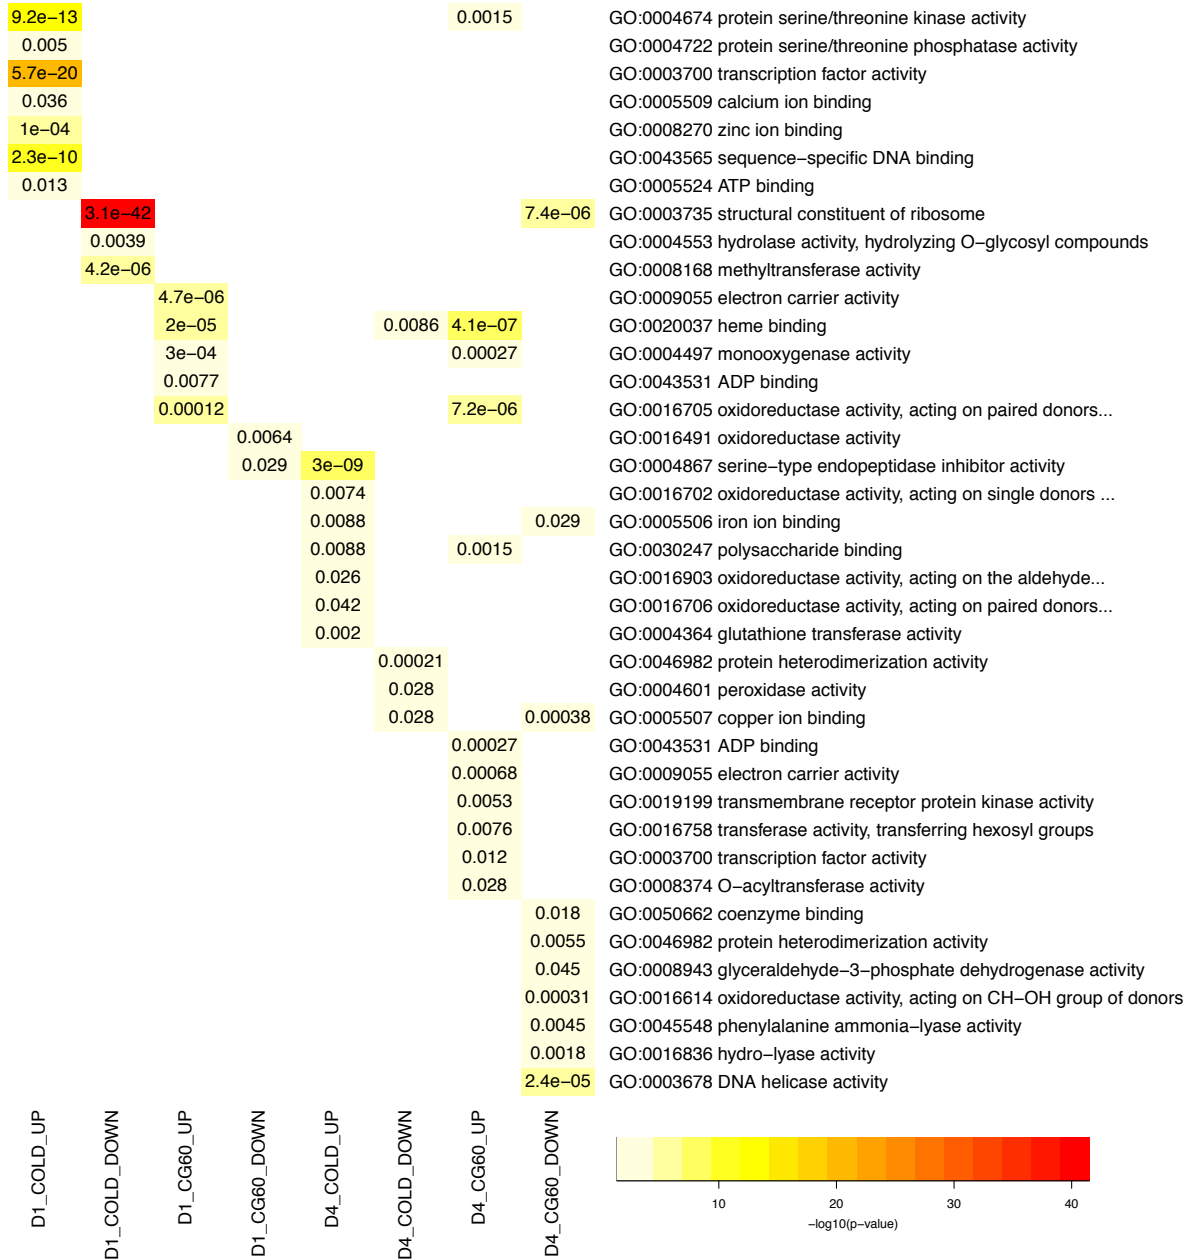

Supplement: 12864_2018_5134_MOESM6_ESM.pdf [file 12864_2018_5134_MOESM6_ESM.pdf]
